# Supplementary material for: Autologous Micro-fragmented Adipose Tissue in Patients With Knee Osteoarthritis: A Systematic Review and Meta-analysis
Source: Research Square preprint supplement (doi:10.21203/rs.3.rs-1109593/v1), 2021-12-06
Supplement: Supplementary file 1 [file 47b70754a1c78b02014ec9fa.docx]

**Supplementary Table S1.** Quality assessment of the included studies

| Study (MINORS) | A clearly stated aim | Inclusion of consecutive patients | Prospective collection of data | Endpoints appropriate to the aim of the study | Unbiased assessment of the study endpoint | Follow-up period appropriate to the aim of the study | Loss to follow up less than 5% | Prospective calculation of the study size | Total |
| --- | --- | --- | --- | --- | --- | --- | --- | --- | --- |
| Boric, 2019 23 | 2 | 2 | 2 | 2 | 1 | 2 | 2 | 0 | 13 |
| Cattaneo, 2018 27 | 2 | 2 | 0 | 2 | 1 | 2 | 2 | 0 | 11 |
| Genechten, 2021 24 | 2 | 1 | 2 | 2 | 1 | 2 | 2 | 0 | 12 |
| Heidari, 2020 25 | 2 | 1 | 1 | 2 | 1 | 2 | 2 | 0 | 11 |
| Hudetz, 2019 16 | 2 | 1 | 2 | 2 | 1 | 2 | 2 | 0 | 12 |
| Malanga, 2020 26 | 2 | 1 | 2 | 2 | 1 | 2 | 2 | 0 | 12 |
| Mautner, 2019 28 | 2 | 1 | 0 | 2 | 1 | 2 | 2 | 0 | 10 |
| Russo, 2017 29 | 2 | 1 | 0 | 2 | 1 | 2 | 2 | 0 | 10 |
